# Supplementary material
Source: Elsevier journal article supplement (https://www.sciencedirect.com/science/article/pii/S2238785418307075)
Supplement: mmc1 [file S2238785418307075:mmc1.docx]

**Synthesis of g-C3N4 /N-doped CeO2 composite for photocatalytic degradation of an herbicide**

Mohan Kumar Kesarlaa, Manuel Octavio Fuentez Torresb, Manuel Antonio Alcudia Ramosb, Filiberto Ortiz Chic, Claudia Guadulupe Espinosa Gonzalezc, M.Alemand, Jose Gilberto Torres Torresb, Srinivas Godavarthic*

**Supplementary material**


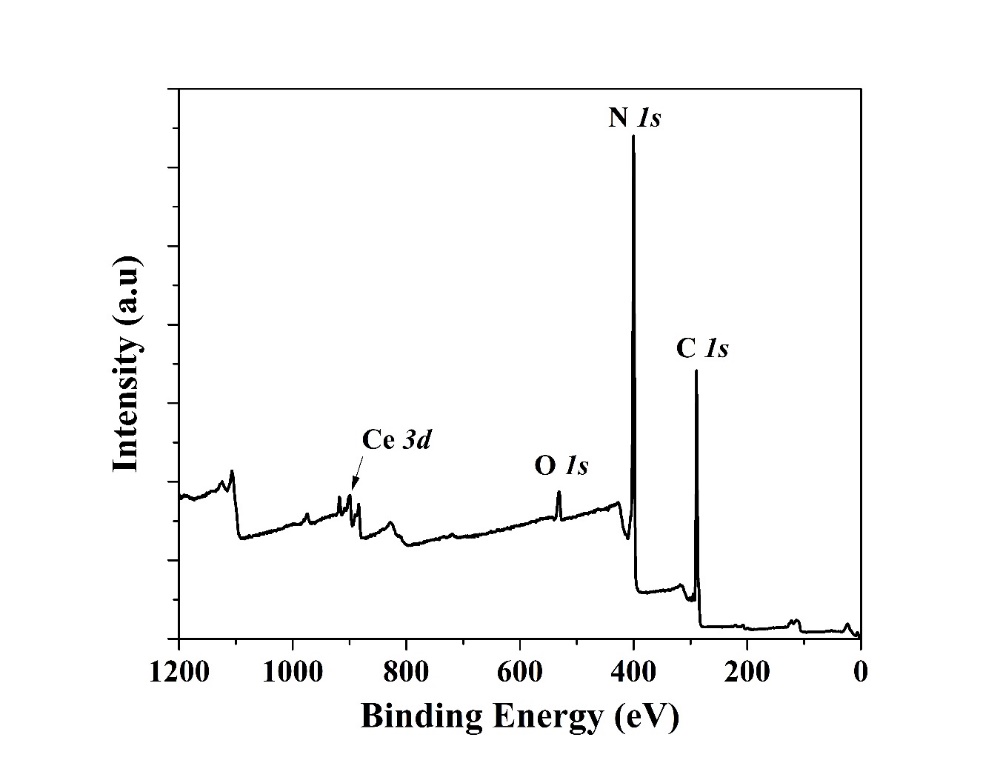


Fig. S1. XPS survey scan for the g-C3N4/ceria composite
